# Supplementary material for: A blue to highly transmissive soluble electrochromic polymer based on poly(3,4-propylenedioxyselenophene) with a high stability and coloration efficiency
Source: Royal Society of Chemistry journal article supplement (doi:10.1039/c0jm04285d), 2011-01-01
Supplement: c0jm04285d.pdf [file c0jm04285d.pdf]

## Supplementary Information

### Blue to Highly Transmissive Soluble Electrochromic Based on Poly(3,4-propylenedioxyselephenone) with High Stability and Coloration Efficiency

*Merve İçli Özkut, Samed Atak, Ahmet M. Önal and Atilla Cihaner*

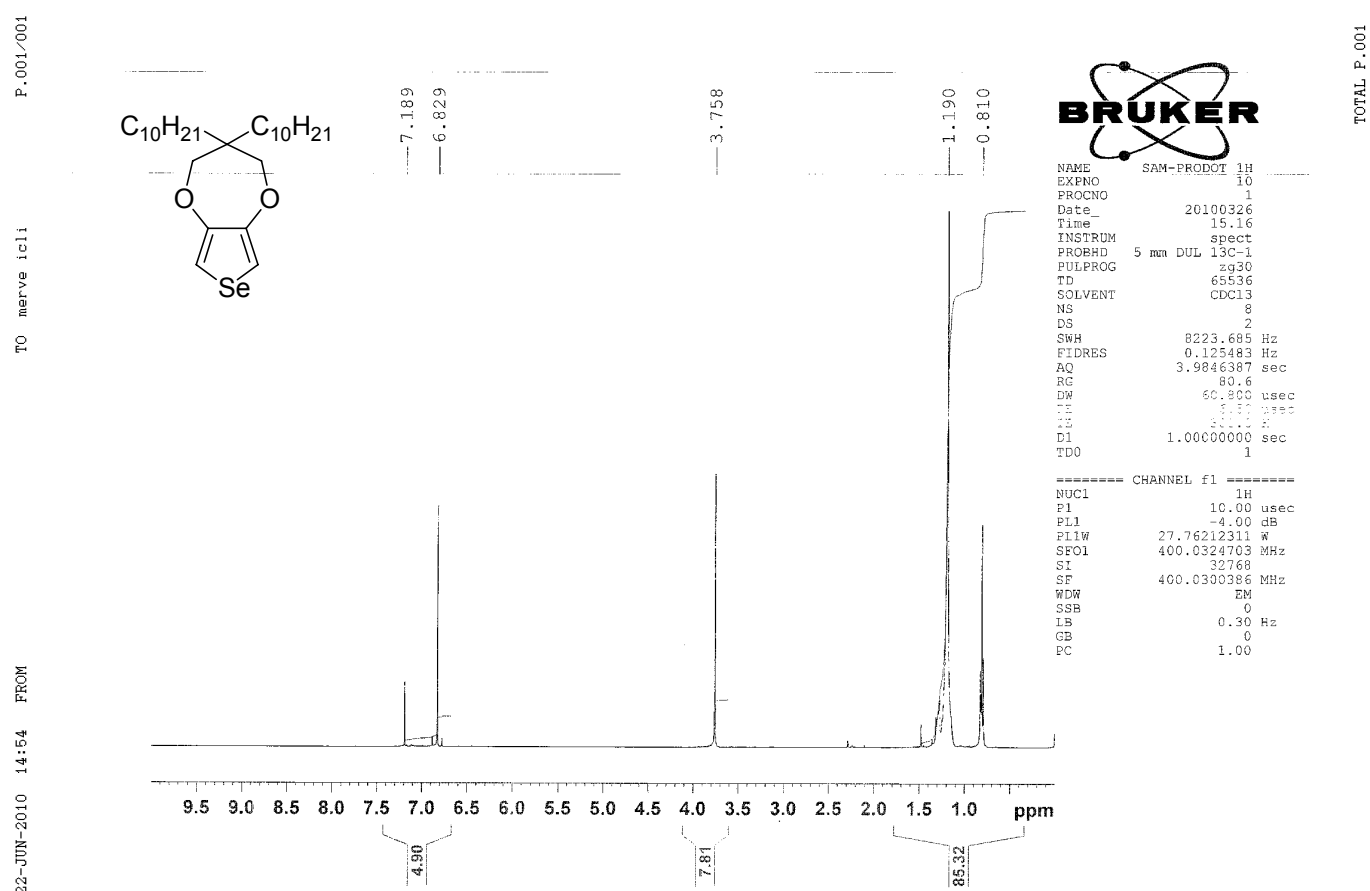

**Figure S1.**  $^1\text{H}$  NMR of ProDOS-C<sub>10</sub>.

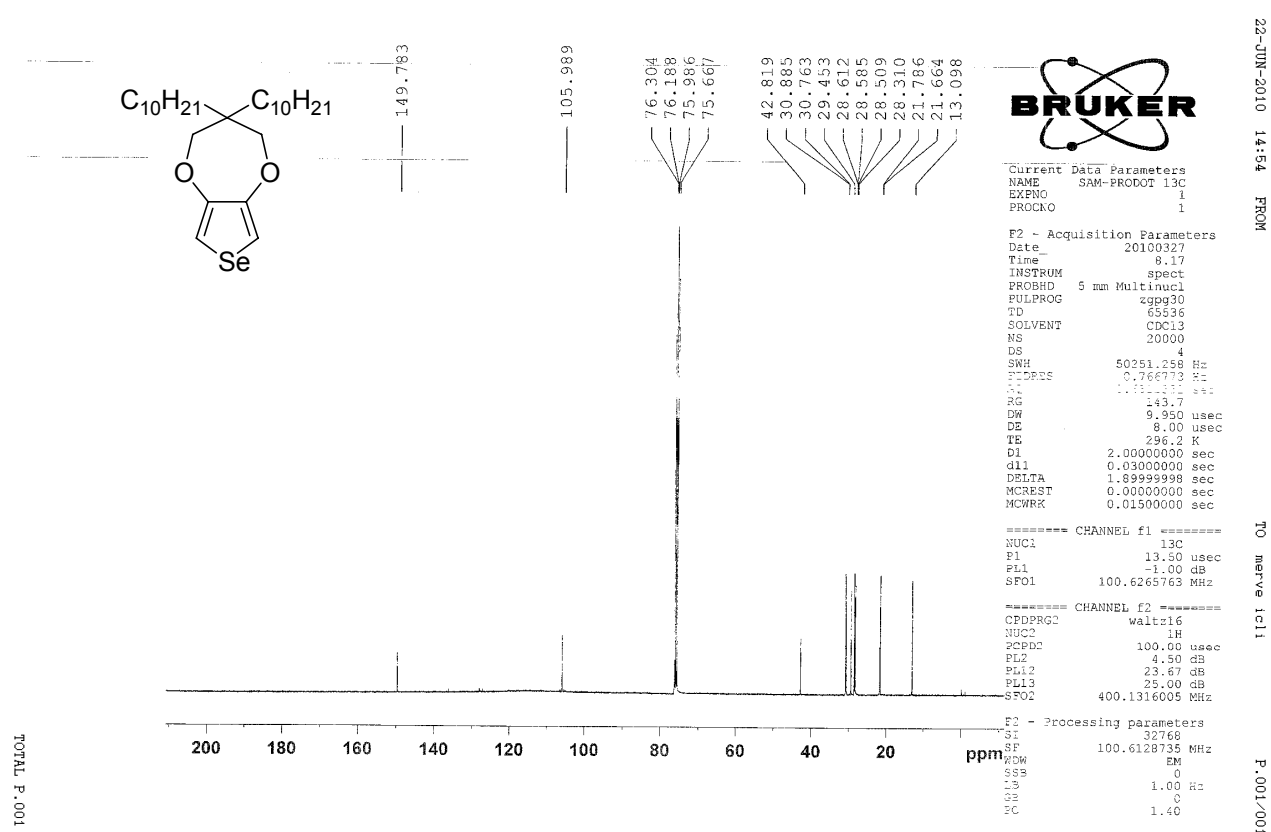

Figure S2. <sup>13</sup>C NMR of ProDOS-C<sub>10</sub>.

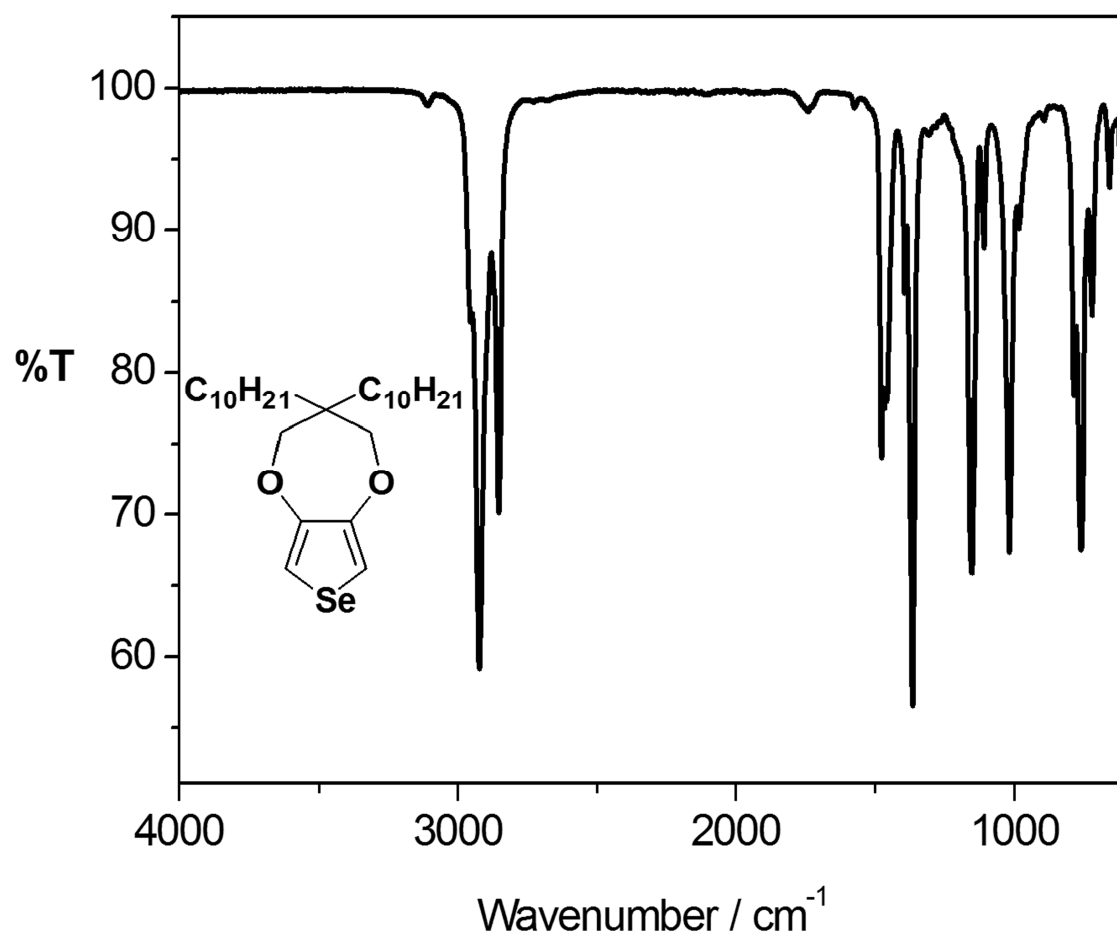

**Figure S3.** FTIR of ProDOS-C<sub>10</sub>.

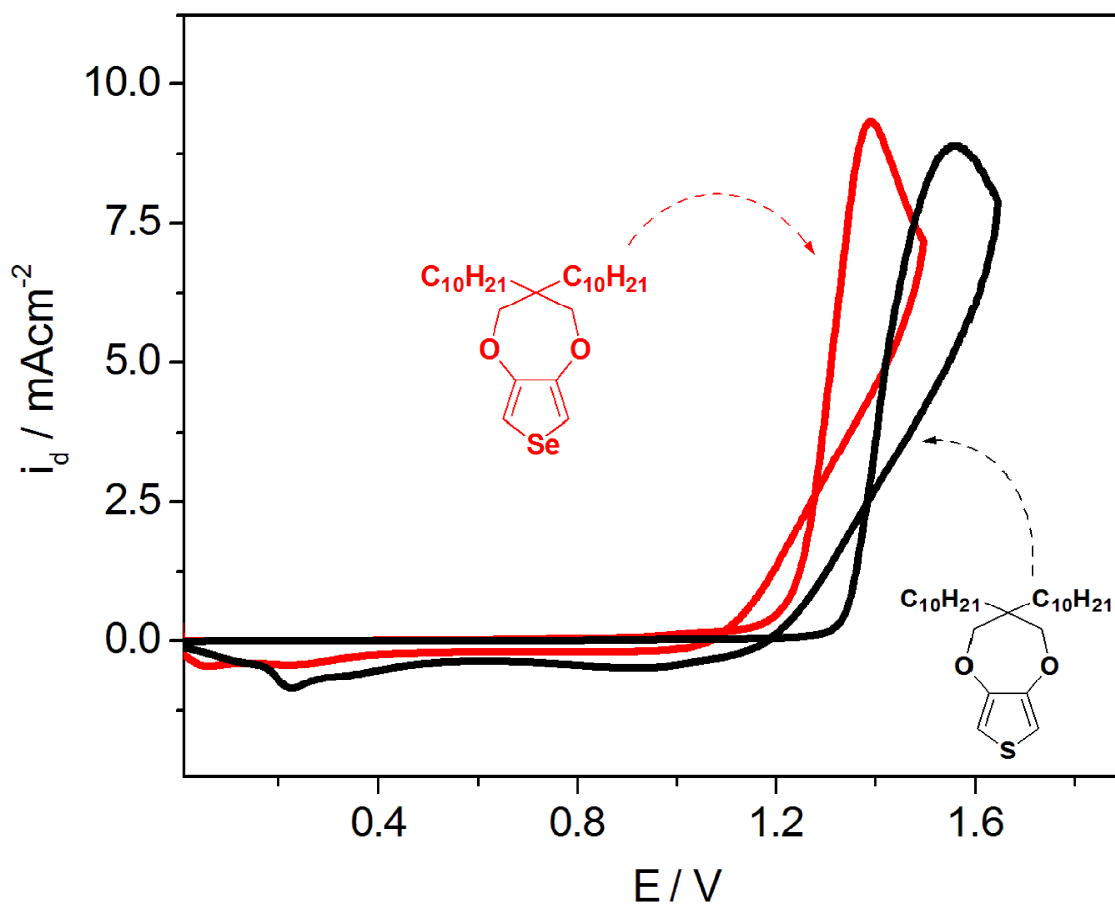

**Figure S4.** Cyclic voltamograms of ProDOT-C<sub>10</sub> and ProDOS-C<sub>10</sub> in 0.1 M TBAH/DCM at a scan rate of 100 mV/s vs. Ag/AgCl.

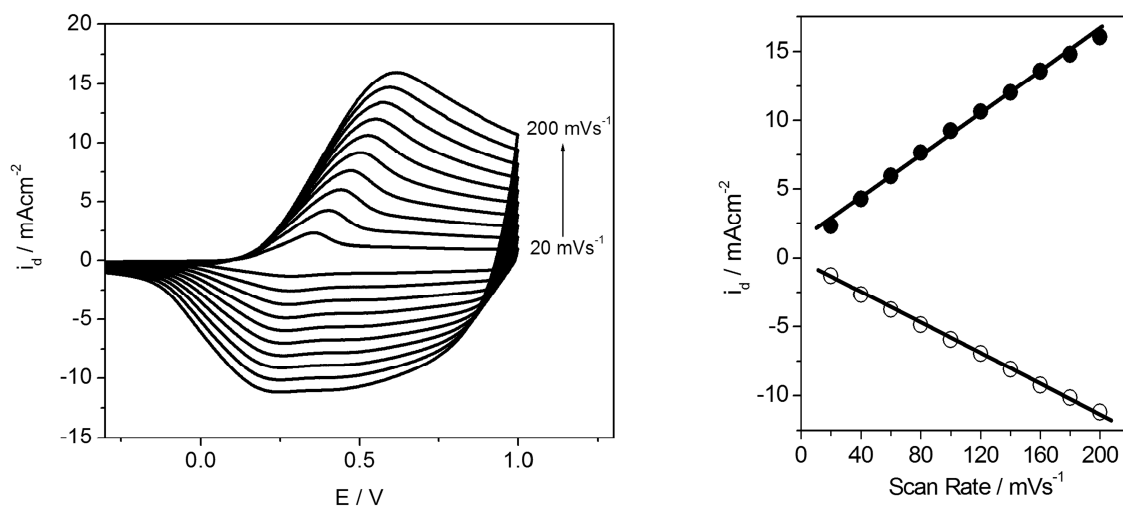

**Figure S5.** Scan rate dependence of PProDOS-C<sub>10</sub> film on a Pt disk electrode in 0.1 M TBAH/ACN at different scan rates between 20 mV/s and 200 mV/s with an increment of 20 mV/s. (b) Relationship of anodic and cathodic current peaks as a function of scan rate between neutral and oxidized states of PProDOS-C<sub>10</sub> film in 0.1M TBAH/ACN.

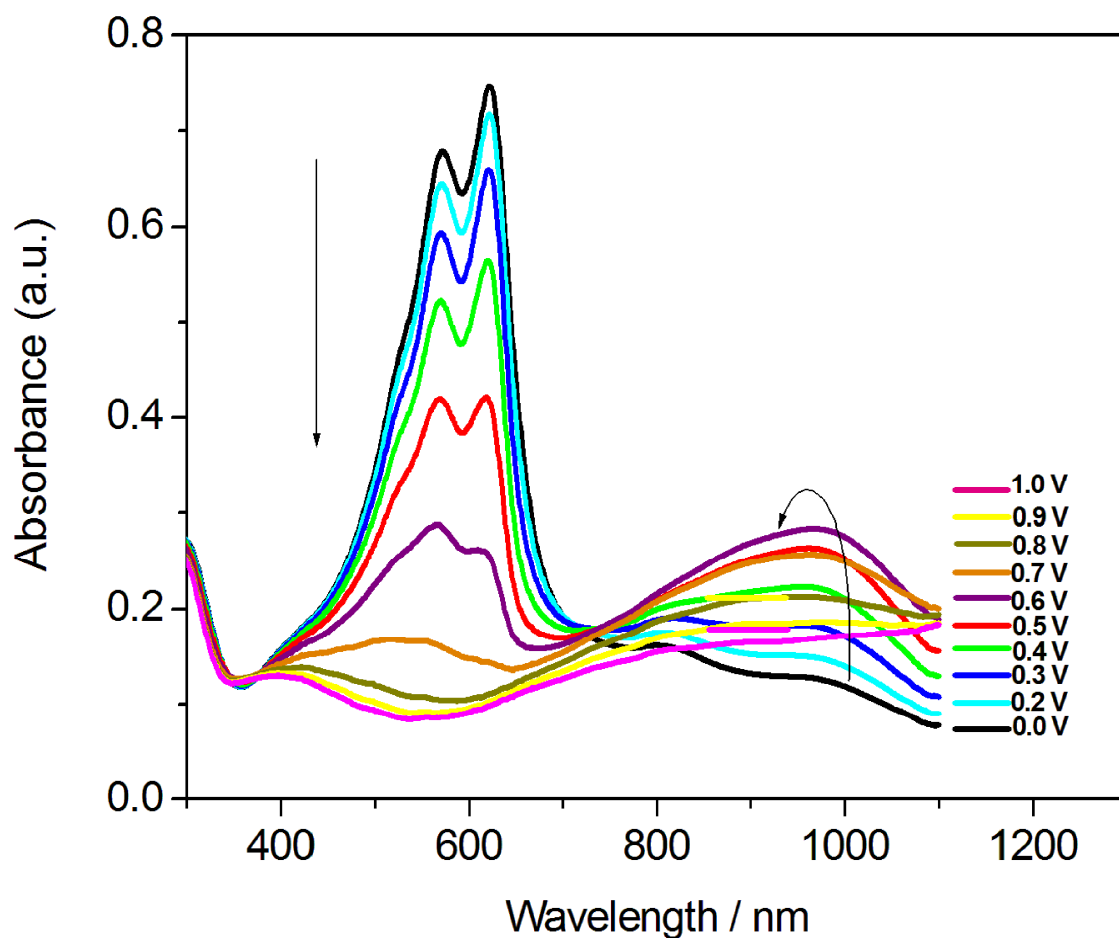

**Figure S6.** Optical absorption spectra of PProDOT-C<sub>10</sub> on ITO in 0.1 M TBAH/ACN at various applied potentials between 0.0 V and 1.0 V.

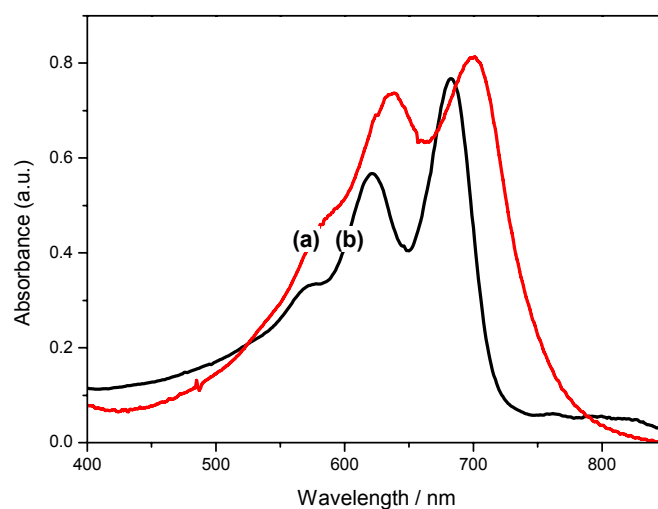

**Figure S7.** Absorption spectra of PProDOS-C<sub>10</sub> film (a) coated on ITO electrode and (b) after dissolving in THF.
